# Supplementary material
Source: PubMed Central journal article supplement (PMC5062770)
Supplement: SD1.pdf [file SD1.pdf]

## SUPPLEMENTAL INFORMATION

**Materials and methods.** *Molecular detection of rickettsial DNA.* Two hundred microliters of the whole blood samples from each patient were used for DNA extraction using a QIAamp DNA mini kit (Qiagen, Hilden, Germany) in accordance with the instructions of the manufacturer. The samples were first screened for rickettsial DNA using polymerase chain reaction (PCR) primers CS78/CS323 (*gltA*) or CS-239/CS-1069 (*gltA-1*) targeting 410 base pairs (bp) and 830 bp of the rickettsial citrate synthase gene, respectively.<sup>1</sup> Positive samples were then subjected to amplification using primers Rr190.70p/Rr190.602n, targeting a 532-bp fragment of the 190-kDa outer membrane protein gene (*ompA*),<sup>2</sup> and primers 120-M59/120-807, targeting a 866-bp fragment of 135-kDa outer membrane protein gene (*ompB*).<sup>3</sup> All PCR assays were performed in a final volume of 20  $\mu$ L containing 2  $\mu$ L of DNA template, 1 $\times$  ExPrime Taq DNA polymerase (GENET BIO, Daejeon, South Korea), and 0.2  $\mu$ M of each primer, in a Veriti thermal cycler (Applied Biosystems Foster City, CA). DNA extracted from *Rickettsia conorii* antigen slides (Fuller Laboratories, Fullerton, CA) was used as positive control for the PCR assay. Sterile distilled water was used as the negative control in each PCR reaction. PCR products were purified using a GeneAll Expin<sup>TM</sup> Combo GP

kit (GeneAll Biotechnology, Seoul, South Korea). The purified DNA was then subjected to sequencing on an ABI PRISM 377 Genetic Analyzer (Applied Biosystems Foster City, CA), using both forward and reverse primers of each PCR assay. The sequences obtained were subjected to Basic Local Alignment Search Tool analysis (<http://blast.ncbi.nlm.nih.gov/Blast.cgi>) to search for homologous sequences in the GenBank database.<sup>4</sup>

## SUPPLEMENTAL REFERENCES

1. Labruna MB, Whitworth T, Horta MC, Bouyer DH, McBride JW, Pinter A, Popov V, Gennari SM, Walker DH, 2004. *Rickettsia* species infecting *Amblyomma cooperi* ticks from an area in the state of Sao Paulo, Brazil, where Brazilian spotted fever is endemic. *J Clin Microbiol* 42: 90–98.
2. Regnery RL, Spruill CL, Plikaytis BD, 1991. Genotypic identification of rickettsiae and estimation of intraspecies sequence divergence for portions of two rickettsial genes. *J Bacteriol* 173: 1576–1589.
3. Roux V, Raoult D, 2000. Phylogenetic analysis of members of the genus *Rickettsia* using the gene encoding the outer-membrane protein rOmpB (*ompB*). *Int J Syst Evol Microbiol* 50: 1449–1455.
4. Altschul SF, Gish W, Miller W, Myers EW, Lipman DJ, 1990. Basic local alignment search tool. *J Mol Biol* 215: 403–410.
